# Supplementary material for: Safety and Tolerability of Transdermal Cannabidiol Gel in Children With Developmental and Epileptic Encephalopathies: A Nonrandomized Controlled Trial
Source: PubMed Central journal article supplement — JAMA Netw Open. 2021 Sep 3;4(9):e2123930. doi: 10.1001/jamanetworkopen.2021.23930 (PMC8417764; doi:10.1001/jamanetworkopen.2021.23930), 2021-09-03
Supplement: jamanetwopen-e2123930-s002.pdf [file jamanetwopen-e2123930-s002.pdf]

## Supplemental Online Content

Scheffer IE, Hulihan J, Messenheimer J, et al. Safety and tolerability of transdermal cannabidiol gel in children with developmental and epileptic encephalopathies: a nonrandomized controlled trial. *JAMA Netw Open*. 2021;4(9):e2123930. doi:10.1001/jamanetworkopen.2021.23930

**eTable 1.** Secondary Outcome Endpoints: Changes from Baseline Assessment

**eTable 2.** Qualitative Evaluation of Improvement or Worsening Associated With CBD Transdermal Gel

**eFigure 1.** Median Percentage Reduction by Seizure Type From Baseline to Week 26

**eFigure 2.** Box Plots of FIAS and TCS for Each 28-day Period

**eFigure 3.** Box Plots (Without Outliers) of FIAS and TCS for Each 28-day Period

This supplemental material has been provided by the authors to give readers additional information about their work.

eTable 1. Secondary Outcome Endpoints: changes from baseline assessment

| Endpoint                                                      | Mean Change (range)      | P-value      |
|---------------------------------------------------------------|--------------------------|--------------|
| Epilepsy and Learning Disabilities Quality of Life - Modified |                          |              |
| Seizure severity                                              |                          |              |
| Month 3.5 (n=45)                                              | <b>-0.18 (-1.8, 1.2)</b> | <b>.011*</b> |
| Month 6.5 (n=40)                                              | <b>-0.19 (-1.2, 0.9)</b> | <b>.008*</b> |
| Behavior                                                      |                          |              |
| Month 3.5 (n=45)                                              | <b>-0.19 (-1.9, 0.8)</b> | <b>.012*</b> |
| Month 6.5 (n=40)                                              | <b>-0.21 (-1.0, 0.4)</b> | <b>.001*</b> |
| Mood                                                          |                          |              |
| Month 3.5 (n=45)                                              | <b>-0.11 (-0.8, 0.6)</b> | <b>.019*</b> |
| Month 6.5 (n=40)                                              | <b>-0.15 (-0.7, 0.4)</b> | <b>.001*</b> |
| Sleep Disturbance Scale for Children                          |                          |              |
| Month 3.5                                                     |                          |              |
| Total score (n=45)                                            | <b>-3.7 (-50, 27)</b>    | <b>.047*</b> |
| Initiating and maintaining sleep (n=45)                       | <b>-3.2 (-32, 13)</b>    | <b>.035*</b> |
| Sleep breathing (n=45)                                        | 0 (-35, 42)              | 1.00         |
| Arousal/nightmares (n=45)                                     | -0.4 (-35, 36)           | .749         |
| Sleep-wake transition (n=45)                                  | -1.6 (-26, 29)           | .406         |
| Excessive somnolence (n=45)                                   | -3.3 (-58, 32)           | .101         |
| Sleep hyperhidrosis (n=45)                                    | -0.7 (-41, 18)           | .642         |
| Month 6.5                                                     |                          |              |
| Total score (n=37)                                            | <b>-5.1 (-33, 24)</b>    | <b>.012*</b> |
| Initiating and maintaining sleep (n=38)                       | <b>-5.1 (-29, 12)</b>    | <b>.006*</b> |
| Sleep breathing (n=40)                                        | 0.4 (-14, 28)            | .797         |
| Arousal/nightmares (n=39)                                     | <b>-1.7 (-12, 11)</b>    | <b>.031*</b> |
| Sleep-wake transition (n=39)                                  | <b>-4.6 (-38, 25)</b>    | <b>.030*</b> |
| Excessive somnolence (n=40)                                   | -3.6 (-23, 28)           | .100         |
| Sleep hyperhidrosis (n=40)                                    | -2.8 (-47, 35)           | .154         |
| University of Washington Caregiver Stress Scale               |                          |              |
| Month 3.5 (n=45)                                              | -1.84 (-53.1, 19.5)      | .230         |
| Month 6.5 (n=40)                                              | -0.45 (-16.6, 26.2)      | .744         |

\*Statistically significant change from baseline (bolded).

eTable 2. Qualitative evaluation of improvement or worsening associated with CBD transdermal gel (n = 43)

| Category                | Improvement/Positive Statements                                        | n (%)   | Worsening/Negative Statements          | n (%)                                     |         |
|-------------------------|------------------------------------------------------------------------|---------|----------------------------------------|-------------------------------------------|---------|
| Behavior/Cognition/Mood | Improved alertness                                                     | 17 (40) | Decreased alertness                    | 2 (5)                                     |         |
|                         | Improved engagement/participation                                      | 15 (35) | --                                     |                                           |         |
|                         | Improved cognition                                                     | 14 (33) | --                                     |                                           |         |
|                         | Attending school on time/more often                                    | 12 (28) | Attending school later/less frequently | 1 (2)                                     |         |
|                         | More energy/less fatigue                                               | 12 (28) | More fatigue/ less energy              | 2 (5)                                     |         |
|                         | Improved concentration                                                 | 10 (23) | --                                     |                                           |         |
|                         | Improved behavior                                                      | 9 (21)  | Worsened behavior                      | 3 (7)                                     |         |
|                         | Improved mood                                                          | 8 (19)  | --                                     |                                           |         |
|                         | Improved speech/communication                                          | 7 (16)  | Worsened speech/communication          | 2 (5)                                     |         |
|                         | Decreased aggression/violence                                          | 2 (5)   | Increased aggression/violence          | 1 (2)                                     |         |
|                         | Improved relationships                                                 | 5 (12)  | --                                     |                                           |         |
|                         | Short-term cognition improvement                                       | 1 (2)   | --                                     |                                           |         |
|                         | --                                                                     |         |                                        | Increased anxiety                         | 1 (2)   |
| Seizures                | Reduction in frequency of seizures                                     | 16 (37) | Increase in frequency of seizures      | 3 (7)                                     |         |
|                         | Reduced amplitude/intensity of seizures                                | 9 (21)  | --                                     |                                           |         |
|                         | Reduction in duration of seizures                                      | 9 (21)  | --                                     |                                           |         |
|                         | Postictal state improvement                                            | 6 (14)  | Increased postictal state              | 1 (2)                                     |         |
|                         | Short-term reduction in frequency of seizures                          | 3 (7)   | --                                     |                                           |         |
|                         | Short-term reduction in amplitude/intensity of seizure                 | 1 (2)   | --                                     |                                           |         |
|                         | Less convulsive behavior                                               | 1 (2)   | Change in seizure semiology            | 1 (2)                                     |         |
| Other                   | Fewer hospital visits                                                  | 4 (9)   | --                                     |                                           |         |
|                         | Improved sleep                                                         | 3 (7)   | Negative impact on circadian rhythm    | 1 (2)                                     |         |
|                         | Increased mobility                                                     | 2 (5)   | Decreased mobility                     | 2 (5)                                     |         |
|                         | Reduced injuries                                                       | 2 (5)   | --                                     |                                           |         |
|                         | Fewer migraine attacks                                                 | 1 (2)   | --                                     |                                           |         |
|                         | --                                                                     |         |                                        | Difficulty in applying gel                | 11 (26) |
|                         | --                                                                     |         |                                        | Negative reaction at gel application site | 8 (19)  |
|                         | --                                                                     |         |                                        | Decreased appetite                        | 1 (2)   |
|                         | --                                                                     |         |                                        | Eating difficulty                         | 1 (2)   |
|                         | --                                                                     |         |                                        | Weight loss                               | 1 (2)   |
| Summary Measures        | Improved social/interpersonal engagement and irritability <sup>a</sup> | 33 (77) |                                        |                                           |         |
|                         | Seizure improvements <sup>b</sup>                                      | 22 (51) |                                        |                                           |         |

|  |                                      |         |               |         |
|--|--------------------------------------|---------|---------------|---------|
|  | Vitality <sup>c</sup>                | 23 (53) |               |         |
|  | Cognition/concentration <sup>d</sup> | 20 (47) |               |         |
|  | School <sup>d</sup>                  | 12 (28) |               |         |
|  | Any improvement                      | 36 (84) | Any worsening | 26 (60) |

<sup>a</sup>Improved alertness, increased engagement/participation, improved speech/communication, behavior, mood, decreased aggression/violence.

<sup>b</sup>Reduction in frequency of seizures, reduced amplitude/intensity of seizures, reduction in duration of seizures, less convulsive behavior.

<sup>c</sup>Improved alertness, more energy/less fatigue, improved sleep.

<sup>d</sup>Improved cognition, improved concentration.

eFigure 1. Median percent reduction by seizure type from baseline to week 26

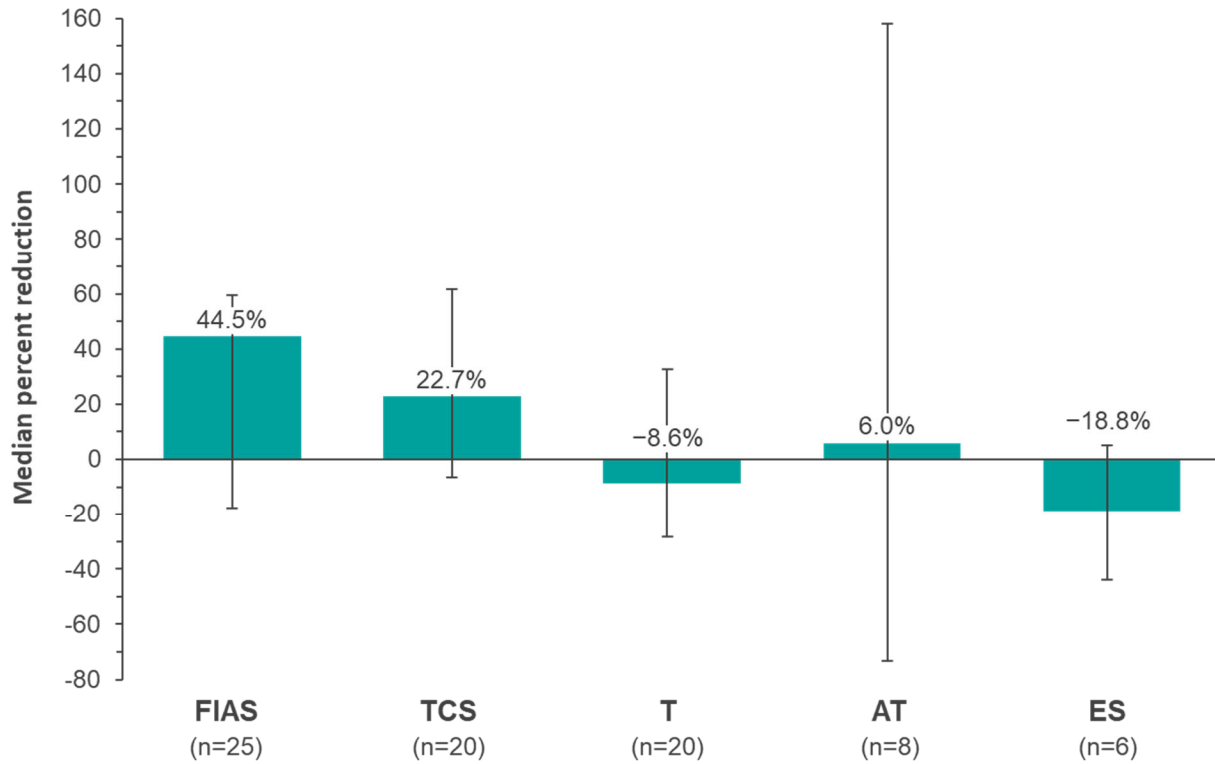

Median percent reduction from baseline to week 26 according to seizure type for seizure types occurring in 6 or more patients. The numbers of patients at each time point are shown under the graph. Error bars represent IQR. AT=atonic; ES=epileptic spasms; FIAS=focal impaired awareness; T=tonic; TCS=tonic-clonic seizures.

eFigure 2. Box plots of FIAS and TCS for each 28-day period

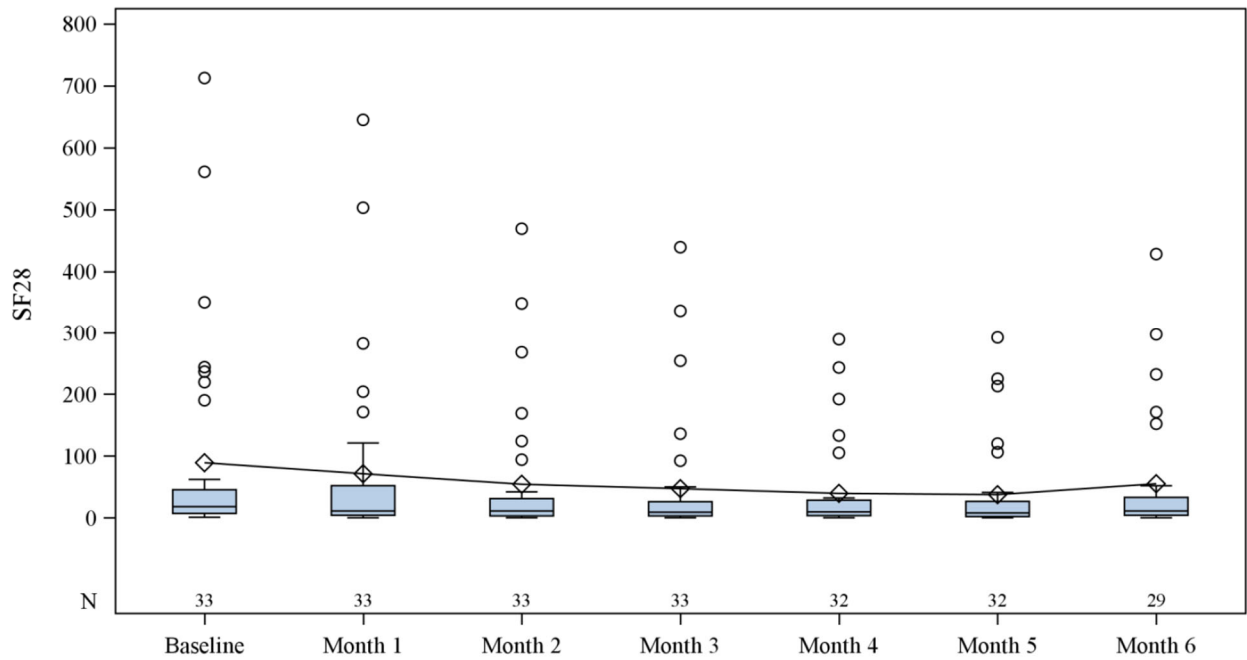

Box plots of FIAS and TCS monthly seizure frequency (SF28) for each 28-day assessment period. Boxes represent IQR with the horizontal line as the median and error bars representing  $1.5 \times$  IQR. Outliers are represented by circles. Diamonds represent mean values at each time point. The number of patients at each time point is shown above each month.

eFigure 3. Box plots (without outliers) of FIAS and TCS for each 28-day period

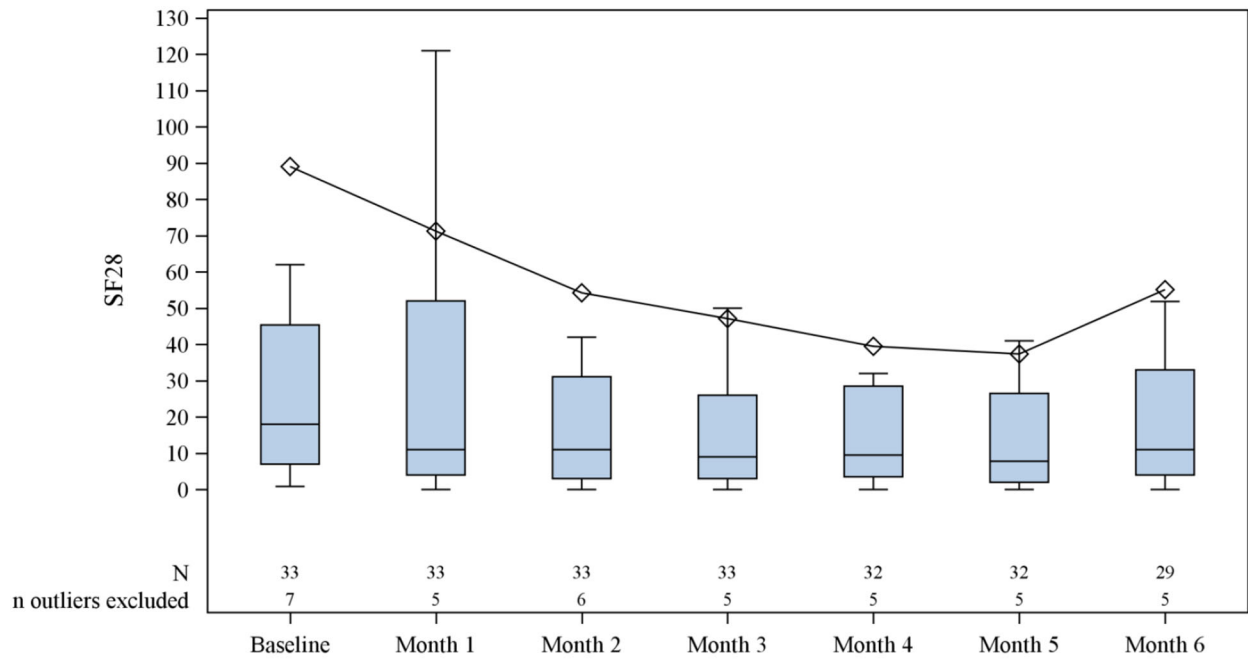

Box plots, without outliers, of FIAS and TCS monthly seizure frequency (SF28) for each 28-day assessment period. Boxes represent IQR with the horizontal line as the median and error bars representing  $1.5 \times$  IQR. Diamonds represent mean values at each time point. The numbers of patients at each time point and the numbers of outliers excluded per time point are shown above each month.
