# Supplementary material for: Safety and Tolerability of Transdermal Cannabidiol Gel in Children With Developmental and Epileptic Encephalopathies: A Nonrandomized Controlled Trial
Source: PubMed Central journal article supplement — JAMA Netw Open. 2021 Sep 3;4(9):e2123930. doi: 10.1001/jamanetworkopen.2021.23930 (PMC8417764; doi:10.1001/jamanetworkopen.2021.23930), 2021-09-03
Supplement: jamanetwopen-e2123930-s004.pdf [file jamanetwopen-e2123930-s004.pdf]

## **Data Sharing Statement**

### **Data**

**Data available:** No

### **Additional Information**

**Explanation for why data not available:** We are continuing to evaluate the data from this open-label phase 2 study with respect to further development of this compound in developmental epileptic encephalopathies. In order to protect the Company's proprietary information and intellectual property rights, we do not believe it is appropriate to release additional data in the public domain at this time.
